# Supplementary material
Source: Elsevier journal article supplement (https://www.sciencedirect.com/science/article/pii/S1885585720304722)
Supplement: mmc1 [file mmc1.pdf]

## MATERIAL ADICIONAL

### Criterios de inclusión del ensayo CROSS-AMI

- Pacientes con síndrome coronario agudo con elevación del segmento ST (SCACEST) tratados con angioplastia primaria, de rescate o facilitada en la arteria culpable del infarto, siempre que el tiempo transcurrido desde el inicio de los síntomas no fuera superior a 48 h. Se consideró SCACEST todo episodio de dolor anginoso típico u otra clínica compatible de más de 30 min de duración y un electrocardiograma con elevación del segmento ST  $\geq 1$  mm en 2 o más derivaciones contiguas (o depresión recíproca  $\geq 1$  mm en las derivaciones V<sub>1</sub> y V<sub>2</sub>) o bloqueo de rama izquierda del haz de His de nueva aparición o presunta nueva aparición.
- En la coronariografía se observó al menos 1 estenosis  $\geq 70\%$  en un vaso diferente de la arteria culpable del infarto, valorada por estimación visual subjetiva del cardiólogo intervencionista. En caso de lesiones intermedias (70-40%), se realizó un análisis cuantitativo *off-line* (*Quantitative Coronary Analysis* [QCA]) y se ofrecía participar en el estudio a los pacientes que presentaban una estenosis  $\geq 50\%$  mediante QCA.

### Criterios de exclusión

- Incapacidad para otorgar consentimiento informado por escrito.
- Enfermedad significativa del tronco común izquierdo.
- *Shock* cardiogénico.
- Lesiones en vasos de diámetro  $\leq 2$  mm.
- Lesión en una rama de una coronaria epicárdica principal de escaso calibre y poco desarrollo.
- Pacientes con cirugía de revascularización aortocoronaria previa.
- Pacientes sometidos a intervención coronaria en el último mes.
- Pacientes con lesiones anatómicas no apropiadas para la intervención coronaria percutánea.
- Pacientes embarazadas o en periodo de lactancia.
- Pacientes con comorbilidades que dificulten la realización de ecocardiograma de esfuerzo o el seguimiento o que pudieran interferir en la supervivencia de los pacientes.

**Tabla 1 del material adicional**Eventos clínicos del ensayo clínico CROSS-AMI<sup>1</sup>

|                                                                                   | RCom<br>(n = 154),<br>n (%) | RSel<br>(n = 152),<br>n (%) | HR (Cox)<br>(IC95%)   | p     |
|-----------------------------------------------------------------------------------|-----------------------------|-----------------------------|-----------------------|-------|
| Evento principal:<br>muerte CV + IAM +<br>revascularización +<br>reingreso por IC | 22 (14,3)                   | 21 (13,8)                   | 1,06 (0,58-1,92)      | 0,853 |
| Muerte CV                                                                         | 2 (1,3)                     | 1 (0,7)                     | 1,97 (0,18-<br>21,71) | 0,580 |
| IAM                                                                               | 15 (9,7)                    | 7 (4,6)                     | 2,21 (0,90-5,43)      | 0,082 |
| Revascularización<br>coronaria                                                    | 16 (10,4)                   | 18 (11,8)                   | 0,88 (0,45-1,72)      | 0,699 |
| Reingreso por IC                                                                  | 1 (0,6)                     | 2 (1,3)                     | 0,50 (0,05-5,48)      | 0,568 |

CV: cardiovascular; HR: *hazard ratio*; IAM: infarto agudo de miocardio;

IC: insuficiencia cardiaca; RCom: revascularización angiográfica completa;

RSel: revascularización selectiva guiada por isquemia en ecocardiografía de estrés.

## **BIBLIOGRAFÍA**

1. Tarifas de los servicios sanitarios prestados en centros del Servicio Gallego de Salud. Disponible en: [www.sergas.es/Asistencia-sanitaria/Prezos-públicos-e-sistema-de-facturación?idioma=es](http://www.sergas.es/Asistencia-sanitaria/Prezos-públicos-e-sistema-de-facturación?idioma=es)). Consultado 1 Abr 2020.
